# Supplementary material for: Application of QPLEXTM biomarkers in cognitively normal individuals across a broad age range and diverse regions with cerebral amyloid deposition
Source: PubMed Central journal article supplement (PMC8814000; doi:10.1038/s12276-021-00719-3), 2022-01-20
Supplement: 12276_2021_719_MOESM1_ESM.pdf [file 12276_2021_719_MOESM1_ESM.pdf]

## Supplementary Information

**Application of *QPLEX*<sup>TM</sup> biomarkers in cognitively normal individuals across a broad age range and diverse regions with cerebral amyloid deposition**

Lee *et al.*

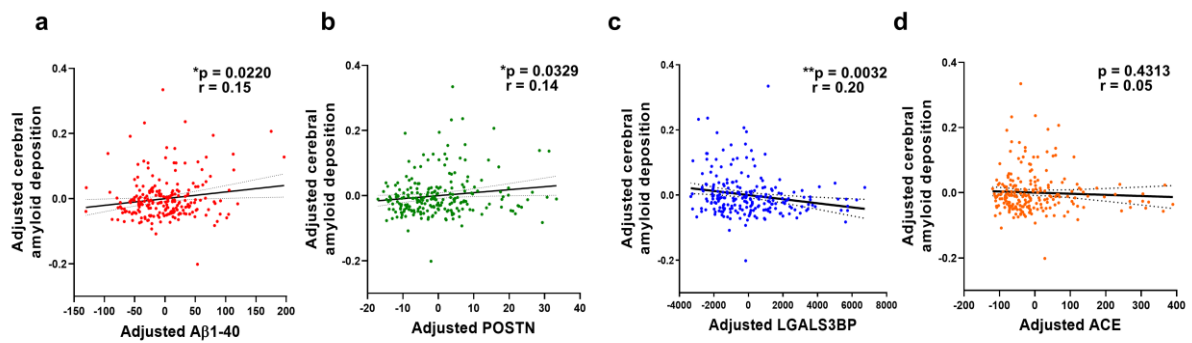

**Supplementary Fig. 1 The QPLEX™ biomarkers and cerebral amyloid deposition for all CN groups (including all age-groups) a-d** Each graph on the left shows the correlation of QPLEX™ biomarker levels with cerebral amyloid deposition for all CN groups. All graphs show the results from the partial correlation analysis with correction for age and sex. P-value cut-off,  $*p < 0.05$ ,  $**p < 0.01$ ,  $***p < 0.001$ , and  $****p < 0.0001$ . P, partial correlation P-value; R, partial correlation coefficient. Dotted lines indicate 95% confidence intervals; CN, cognitively normal

**Supplementary Table 1. Demographic data of the participants (based on age-groups)**

| Characteristics (n)                   | 1 <sup>st</sup> tertile (47)  | 2 <sup>nd</sup> tertile (77)  | 3 <sup>rd</sup> tertile (97)  | P-value               |
|---------------------------------------|-------------------------------|-------------------------------|-------------------------------|-----------------------|
| Sex, M/F                              | 24/23                         | 32/45                         | 44/53                         | 0.5871 <sup>†</sup>   |
| Age, years, mean $\pm$ SEM (range)    | 32.04 $\pm$ 0.9<br>(21 to 42) | 56.25 $\pm$ 0.7<br>(43 to 65) | 74.06 $\pm$ 0.5<br>(66 to 87) | < 0.0001*             |
| Education, mean $\pm$ SEM             | 15.19 $\pm$ 0.3               | 12.83 $\pm$ 0.5               | 11.39 $\pm$ 0.5               | < 0.0001*             |
| MMSE raw score, mean $\pm$ SEM        | 29.13 $\pm$ 0.1               | 28.12 $\pm$ 0.2               | 26.64 $\pm$ 0.2               | < 0.0001*             |
| MMSE z score, mean $\pm$ SEM          | 0.80 $\pm$ 0.1                | 0.55 $\pm$ 0.1                | 0.26 $\pm$ 0.1                | < 0.0001*             |
| CDR (n)                               | 0 (47)                        | 0 (77)                        | 0 (97)                        | 1                     |
| ApoE4 positivity, $\epsilon$ 4+/N (%) | 13/47                         | 15/77 (%)                     | 24/97                         | 0.5416 <sup>†</sup>   |
| PiB (SUVR), mean $\pm$ SEM            | 1.08 $\pm$ 0.01               | 1.09 $\pm$ 0.01               | 1.29 $\pm$ 0.03               | < 0.0001*             |
| PiB positivity (- / +), n             | 47/0                          | 75/2                          | 63/34                         | < 0.0001 <sup>†</sup> |

CN, cognitively normal; PiB, Pittsburgh compound B; - or +, PiB positivity; SEM, standard error of the mean; n, number of participants; MMSE, Mini-Mental State Examination; MMSE z score, a revised value of the MMSE score considering age, sex, and education level; CDR, Clinical Dementia Rating; ApoE, Apolipoprotein E; SUVR, standardized uptake value ratio; N, total number of participants.

- \*, significance by *t*-test; †, significance by chi-squared test.

**Supplementary Table 2. Comparison of QPLEX™ biomarker levels between CN- and CN+ (including all age-groups) with correction for age and sex**

| <b>Factors</b>  | <b>Mean difference</b> | <b>Std. Error</b> | <b>P<sup>a</sup></b> | <b>95% CI<sup>a</sup></b> |
|-----------------|------------------------|-------------------|----------------------|---------------------------|
| <b>Aβ1-40</b>   | -22.3647               | 9.7673            | 0.0230               | -41.6166 to -3.1128       |
| <b>POSTN</b>    | -5.1039                | 2.0547            | 0.0138               | -9.1539 to -1.0540        |
| <b>LGALS3BP</b> | 1801.1584              | 390.4209          | <0.0001              | 1031.6559 to 2570.6610    |
| <b>ACE</b>      | 10.0631                | 20.1814           | 0.6186               | -29.7177 to 49.8439       |

<sup>a</sup> Bonferroni corrected

**\*Abbreviations:** DF, degrees of freedom; F, F statistic; P, significance level; Std. Error, standard error; CI, confidence interval; PiB-PET, Pittsburgh compound B positron emission tomography; Aβ1-40, amyloid beta 1-40; POSTN, periostin; LGALS3BP, galectin-3 binding protein; ACE, angiotensin-converting enzyme.

**Supplementary Table 3. Multiple regression analysis on the 3rd tertile group (>65 years)**

| <b>QPLEX™ markers</b>                             |                    |                   |          |          |                            |                                |                                           |
|---------------------------------------------------|--------------------|-------------------|----------|----------|----------------------------|--------------------------------|-------------------------------------------|
| <b>Dependent Y</b>                                |                    |                   |          |          |                            |                                | <b>Cerebral amyloid deposition (SUVR)</b> |
| <b>Sample size</b>                                |                    |                   |          |          |                            |                                | 94                                        |
| <b>Coefficient of determination R<sup>2</sup></b> |                    |                   |          |          |                            |                                | 0.2437                                    |
| <b>R<sup>2</sup>- adjusted</b>                    |                    |                   |          |          |                            |                                | 0.2097                                    |
| <b>Multiple correlation coefficient</b>           |                    |                   |          |          |                            |                                | 0.4937                                    |
| <b>Residual standard deviation</b>                |                    |                   |          |          |                            |                                | 0.2791                                    |
| <b>Ind. variables</b>                             | <b>Coefficient</b> | <b>Std. Error</b> | <b>t</b> | <b>P</b> | <b>r<sub>partial</sub></b> | <b>r<sub>semipartial</sub></b> | <b>VIF</b>                                |
| <b>(Constant)</b>                                 | 1.3670             |                   |          |          |                            |                                |                                           |
| <b>Aβ1-40</b>                                     | 0.0008808          | 0.0005743         | 1.534    | 0.1286   | 0.1605                     | 0.1414                         | 1.165                                     |
| <b>LGALS3BP</b>                                   | -0.00005646        | 0.00001641        | -3.440   | 0.0009   | -0.3426                    | 0.3171                         | 1.214                                     |
| <b>ACE</b>                                        | -0.0008850         | 0.0004007         | -2.209   | 0.0298   | -0.2280                    | 0.2036                         | 1.506                                     |
| <b>POSTN</b>                                      | 0.01381            | 0.003477          | 3.973    | 0.0001   | 0.3882                     | 0.3663                         | 1.492                                     |
| <b>QPLEX™ markers + Sex + Age</b>                 |                    |                   |          |          |                            |                                |                                           |
| <b>Dependent Y</b>                                |                    |                   |          |          |                            |                                | <b>Cerebral amyloid deposition (SUVR)</b> |
| <b>Sample size</b>                                |                    |                   |          |          |                            |                                | 94                                        |
| <b>Coefficient of determination R<sup>2</sup></b> |                    |                   |          |          |                            |                                | 0.2468                                    |
| <b>R<sup>2</sup>- adjusted</b>                    |                    |                   |          |          |                            |                                | 0.1948                                    |
| <b>Multiple correlation coefficient</b>           |                    |                   |          |          |                            |                                | 0.4968                                    |
| <b>Residual standard deviation</b>                |                    |                   |          |          |                            |                                | 0.2817                                    |
| <b>Ind. variables</b>                             | <b>Coefficient</b> | <b>Std. Error</b> | <b>t</b> | <b>P</b> | <b>r<sub>partial</sub></b> | <b>r<sub>semipartial</sub></b> | <b>VIF</b>                                |
| <b>(Constant)</b>                                 | 1.2060             |                   |          |          |                            |                                |                                           |
| <b>Aβ1-40</b>                                     | 0.0009375          | 0.0005877         | 1.595    | 0.1143   | 0.1686                     | 0.1484                         | 1.198                                     |
| <b>LGALS3BP</b>                                   | -0.00005411        | 0.00001703        | -3.178   | 0.0021   | -0.3225                    | 0.2957                         | 1.282                                     |
| <b>ACE</b>                                        | -0.0008844         | 0.0004051         | -2.183   | 0.0317   | -0.2279                    | 0.2031                         | 1.511                                     |
| <b>POSTN</b>                                      | 0.01317            | 0.003694          | 3.565    | 0.0006   | 0.3570                     | 0.3317                         | 1.653                                     |
| <b>Sex</b>                                        | -0.02716           | 0.06029           | -0.450   | 0.6535   | -0.04824                   | 0.04191                        | 1.064                                     |
| <b>Age</b>                                        | 0.002239           | 0.005912          | 0.379    | 0.7058   | 0.04057                    | 0.03523                        | 1.108                                     |
| <b>QPLEX™ markers + Sex + Age + ApoE genotype</b> |                    |                   |          |          |                            |                                |                                           |
| <b>Dependent Y</b>                                |                    |                   |          |          |                            |                                | <b>Cerebral amyloid deposition (SUVR)</b> |
| <b>Sample size</b>                                |                    |                   |          |          |                            |                                | 94                                        |
| <b>Coefficient of determination R<sup>2</sup></b> |                    |                   |          |          |                            |                                | 0.2778                                    |
| <b>R<sup>2</sup>- adjusted</b>                    |                    |                   |          |          |                            |                                | 0.2190                                    |
| <b>Multiple correlation coefficient</b>           |                    |                   |          |          |                            |                                | 0.5270                                    |
| <b>Residual standard deviation</b>                |                    |                   |          |          |                            |                                | 0.2775                                    |
| <b>Ind. variables</b>                             | <b>Coefficient</b> | <b>Std. Error</b> | <b>t</b> | <b>P</b> | <b>r<sub>partial</sub></b> | <b>r<sub>semipartial</sub></b> | <b>VIF</b>                                |
| <b>(Constant)</b>                                 | 1.3271             |                   |          |          |                            |                                |                                           |
| <b>Aβ1-40</b>                                     | 0.0008562          | 0.0005804         | 1.475    | 0.1438   | 0.1571                     | 0.1352                         | 1.204                                     |
| <b>LGALS3BP</b>                                   | -0.00005650        | 0.00001682        | -3.360   | 0.0012   | -0.3406                    | 0.3079                         | 1.289                                     |
| <b>ACE</b>                                        | -0.0007833         | 0.0004025         | -1.946   | 0.0549   | -0.2054                    | 0.1784                         | 1.537                                     |
| <b>POSTN</b>                                      | 0.01257            | 0.003652          | 3.442    | 0.0009   | 0.3480                     | 0.3154                         | 1.665                                     |
| <b>Sex</b>                                        | -0.02361           | 0.05941           | -0.397   | 0.6921   | -0.04281                   | 0.03642                        | 1.065                                     |
| <b>Age</b>                                        | 0.0004404          | 0.005897          | 0.0747   | 0.9406   | 0.008053                   | 0.006844                       | 1.137                                     |
| <b>ApoE</b>                                       | 0.1317             | 0.06859           | 1.921    | 0.0581   | 0.2028                     | 0.1760                         | 1.061                                     |

\***Abbreviations:** SUVR, standardized uptake value ratio; Ind., independent; VIF, variance inflation factor; Aβ1-40, amyloid beta 1-40; LGALS3BP, galectin-3 binding protein; ACE, angiotensin-converting enzyme; POSTN, periostin; ApoE, apolipoprotein E.
